# Supplementary material for: In situ Sr isotope measurement of small glass samples using multiple-Faraday collector inductively coupled plasma mass spectrometry with 1012Ω resistor high gain Faraday amplifiers
Source: Royal Society of Chemistry journal article supplement (doi:10.1039/c4ja00297k), 2014-10-27
Supplement: c4ja00297k1.pdf [file c4ja00297k1.pdf]

**E.S.I. Data Table 1 Analytical results of Sr isotope ratios**

| Day                             | Run ID | Crater     | Sample   | <sup>83</sup> Kr (V) | <sup>83.5</sup> M (V) | <sup>84</sup> Sr (V) | <sup>85</sup> Rb (V) | <sup>86</sup> Sr (V) | <sup>86.5</sup> M (V) | <sup>87</sup> Sr (V) | <sup>88</sup> Sr (V) | <sup>84</sup> Sr/ <sup>86</sup> Sr | <sup>87</sup> Sr/ <sup>86</sup> Sr | <sup>88</sup> Sr/ <sup>86</sup> Sr | <sup>37</sup> Sr/ <sup>86</sup> Sr cor | 2SE            |
|---------------------------------|--------|------------|----------|----------------------|-----------------------|----------------------|----------------------|----------------------|-----------------------|----------------------|----------------------|------------------------------------|------------------------------------|------------------------------------|----------------------------------------|----------------|
| JUL 26 2014                     | Run5   | 200um/20Hz | MkAn1_1  | 0.00117              | -0.00001              | 0.01178              | 0.00004              | 0.21948              | -0.00002              | 0.15805              | 1.92449              | 0.05624                            | 0.70360                            | 8.76804                            | 0.70352                                | 0.00013        |
| JUL 26 2014                     | Run6   | 200um/20Hz | MkAn1_2  | 0.00133              | 0.00001               | 0.01286              | 0.00006              | 0.24015              | -0.00001              | 0.17297              | 2.10626              | 0.05614                            | 0.70363                            | 8.77060                            | 0.70355                                | 0.00012        |
| JUL 26 2014                     | Run7   | 200um/20Hz | MkAn1_3  | 0.00154              | -0.00001              | 0.01445              | 0.00008              | 0.27020              | -0.00001              | 0.19460              | 2.36967              | 0.05607                            | 0.70359                            | 8.76992                            | 0.70350                                | 0.00010        |
| JUL 26 2014                     | Run8   | 200um/20Hz | MkAn1_4  | 0.00180              | -0.00001              | 0.01642              | 0.00074              | 0.30698              | 0.00000               | 0.22138              | 2.69283              | 0.05609                            | 0.70357                            | 8.77176                            | 0.70348                                | 0.00012        |
| JUL 26 2014                     | Run9   | 200um/20Hz | MkAn1_5  | 0.00119              | 0.00000               | 0.01175              | 0.00005              | 0.21935              | 0.00000               | 0.15794              | 1.92321              | 0.05613                            | 0.70351                            | 8.76742                            | 0.70342                                | 0.00012        |
| <b>Average and error in 2SD</b> |        |            |          |                      |                       |                      |                      |                      |                       |                      |                      |                                    | <b>0.70358</b>                     | <b>0.00009</b>                     | <b>0.70349</b>                         | <b>0.00010</b> |
| JUL 24 2014                     | Run8   | 200um/10Hz | MkAn1_1  | 0.00028              | 0.00000               | 0.00565              | 0.00003              | 0.10349              | 0.00000               | 0.07445              | 0.90576              | 0.05710                            | 0.70352                            | 8.75227                            | 0.70352                                | 0.00021        |
| JUL 24 2014                     | Run9   | 200um/10Hz | MkAn1_2  | 0.00026              | -0.00001              | 0.00518              | 0.00003              | 0.09405              | 0.00000               | 0.06760              | 0.82241              | 0.05762                            | 0.70325                            | 8.74408                            | 0.70330                                | 0.00021        |
| JUL 24 2014                     | Run10  | 200um/10Hz | MkAn1_3  | 0.00024              | -0.00001              | 0.00477              | 0.00003              | 0.08776              | -0.00001              | 0.06311              | 0.76786              | 0.05683                            | 0.70337                            | 8.74932                            | 0.70335                                | 0.00022        |
| JUL 24 2014                     | Run11  | 200um/10Hz | MkAn1_4  | 0.00026              | 0.00000               | 0.00518              | 0.00003              | 0.09558              | -0.00001              | 0.06875              | 0.83626              | 0.05665                            | 0.70348                            | 8.74836                            | 0.70344                                | 0.00019        |
| JUL 24 2014                     | Run12  | 200um/10Hz | MkAn1_5  | 0.00026              | 0.00000               | 0.00506              | 0.00004              | 0.09280              | 0.00000               | 0.06674              | 0.81166              | 0.05703                            | 0.70352                            | 8.74643                            | 0.70352                                | 0.00020        |
| JUL 24 2014                     | Run38  | 200um/10Hz | MkAn1_31 | 0.00040              | 0.00000               | 0.00835              | 0.00010              | 0.15556              | 0.00000               | 0.11188              | 1.36001              | 0.05609                            | 0.70355                            | 8.74162                            | 0.70346                                | 0.00013        |
| JUL 24 2014                     | Run39  | 200um/10Hz | MkAn1_32 | 0.00040              | 0.00001               | 0.00848              | 0.00005              | 0.15871              | 0.00000               | 0.11416              | 1.38802              | 0.05585                            | 0.70368                            | 8.74544                            | 0.70357                                | 0.00012        |
| JUL 24 2014                     | Run40  | 200um/10Hz | MkAn1_33 | 0.00038              | -0.00002              | 0.00827              | 0.00004              | 0.15527              | 0.00000               | 0.11166              | 1.35790              | 0.05568                            | 0.70352                            | 8.74486                            | 0.70339                                | 0.00014        |
| JUL 24 2014                     | Run41  | 200um/10Hz | MkAn1_34 | 0.00042              | 0.00000               | 0.00868              | 0.00005              | 0.16319              | -0.00001              | 0.11737              | 1.42700              | 0.05560                            | 0.70365                            | 8.74416                            | 0.70352                                | 0.00020        |
| JUL 24 2014                     | Run42  | 200um/10Hz | MkAn1_35 | 0.00041              | -0.00001              | 0.00859              | 0.00005              | 0.16161              | -0.00002              | 0.11623              | 1.41360              | 0.05553                            | 0.70353                            | 8.74682                            | 0.70338                                | 0.00013        |
| JUL 24 2014                     | Run68  | 200um/10Hz | MkAn1_61 | 0.00061              | 0.00000               | 0.00863              | 0.00003              | 0.16132              | -0.00001              | 0.11618              | 1.41451              | 0.05608                            | 0.70368                            | 8.76833                            | 0.70359                                | 0.00015        |
| JUL 25 2014                     | Run6   | 200um/10Hz | MkAn1_1  | 0.00073              | 0.00000               | 0.00926              | 0.00009              | 0.17127              | -0.00001              | 0.12330              | 1.50077              | 0.05660                            | 0.70349                            | 8.76259                            | 0.70345                                | 0.00015        |
| JUL 25 2014                     | Run7   | 200um/10Hz | MkAn1_2  | 0.00064              | -0.00001              | 0.00825              | 0.00005              | 0.15199              | 0.00000               | 0.10938              | 1.33119              | 0.05683                            | 0.70352                            | 8.75837                            | 0.70350                                | 0.00017        |
| JUL 25 2014                     | Run8   | 200um/10Hz | MkAn1_3  | 0.00073              | -0.00002              | 0.00914              | 0.00005              | 0.16897              | -0.00001              | 0.12162              | 1.48030              | 0.05667                            | 0.70355                            | 8.76053                            | 0.70352                                | 0.00010        |
| JUL 25 2014                     | Run9   | 200um/10Hz | MkAn1_4  | 0.00079              | -0.00002              | 0.00968              | 0.00002              | 0.17855              | 0.00000               | 0.12849              | 1.56437              | 0.05677                            | 0.70344                            | 8.76091                            | 0.70341                                | 0.00013        |
| JUL 25 2014                     | Run10  | 200um/10Hz | MkAn1_5  | 0.00059              | 0.00000               | 0.00799              | 0.00004              | 0.14725              | -0.00001              | 0.10595              | 1.28967              | 0.05684                            | 0.70337                            | 8.75807                            | 0.70335                                | 0.00014        |
| JUL 26 2014                     | Run10  | 200um/10Hz | MkAn1_1  | 0.00054              | 0.00000               | 0.00635              | 0.00003              | 0.11686              | -0.00001              | 0.08414              | 1.02456              | 0.05691                            | 0.70354                            | 8.76722                            | 0.70353                                | 0.00017        |
| JUL 26 2014                     | Run11  | 200um/10Hz | MkAn1_2  | 0.00058              | 0.00001               | 0.00682              | 0.00017              | 0.12616              | 0.00000               | 0.09090              | 1.10618              | 0.05663                            | 0.70353                            | 8.76792                            | 0.70349                                | 0.00013        |
| JUL 26 2014                     | Run12  | 200um/10Hz | MkAn1_3  | 0.00045              | -0.00001              | 0.00559              | 0.00004              | 0.10370              | 0.00000               | 0.07467              | 0.90882              | 0.05648                            | 0.70362                            | 8.76379                            | 0.70357                                | 0.00022        |
| JUL 26 2014                     | Run13  | 200um/10Hz | MkAn1_4  | 0.00046              | -0.00001              | 0.00577              | 0.00012              | 0.10699              | 0.00000               | 0.07706              | 0.93788              | 0.05652                            | 0.70343                            | 8.76530                            | 0.70338                                | 0.00020        |
| JUL 26 2014                     | Run14  | 200um/10Hz | MkAn1_5  | 0.00055              | -0.00001              | 0.00672              | 0.00004              | 0.12461              | -0.00001              | 0.08971              | 1.09240              | 0.05649                            | 0.70344                            | 8.76664                            | 0.70339                                | 0.00022        |
| <b>Average and error in 2SD</b> |        |            |          |                      |                       |                      |                      |                      |                       |                      |                      |                                    | <b>0.70351</b>                     | <b>0.00021</b>                     | <b>0.70346</b>                         | <b>0.00017</b> |
| JUL 24 2014                     | Run13  | 100um/10Hz | MkAn1_6  | 0.00011              | -0.00001              | 0.00212              | 0.00001              | 0.03820              | -0.00002              | 0.02747              | 0.33436              | 0.05785                            | 0.70347                            | 8.75261                            | 0.70355                                | 0.00047        |
| JUL 24 2014                     | Run14  | 100um/10Hz | MkAn1_7  | 0.00009              | 0.00000               | 0.00216              | 0.00001              | 0.03921              | 0.00000               | 0.02820              | 0.34328              | 0.05764                            | 0.70335                            | 8.75318                            | 0.70341                                | 0.00048        |
| JUL 24 2014                     | Run15  | 100um/10Hz | MkAn1_8  | 0.00011              | 0.00000               | 0.00229              | 0.00001              | 0.04164              | -0.00001              | 0.02996              | 0.36461              | 0.05761                            | 0.70330                            | 8.75377                            | 0.70335                                | 0.00047        |
| JUL 24 2014                     | Run16  | 100um/10Hz | MkAn1_9  | 0.00012              | -0.00001              | 0.00252              | 0.00001              | 0.04584              | 0.00001               | 0.03298              | 0.40156              | 0.05772                            | 0.70343                            | 8.75992                            | 0.70349                                | 0.00044        |
| JUL 24 2014                     | Run17  | 100um/10Hz | MkAn1_10 | 0.00013              | 0.00001               | 0.00270              | 0.00002              | 0.04892              | 0.00000               | 0.03521              | 0.42854              | 0.05793                            | 0.70337                            | 8.75998                            | 0.70346                                | 0.00033        |
| JUL 24 2014                     | Run43  | 100um/10Hz | MkAn1_36 | 0.00011              | 0.00000               | 0.00296              | 0.00003              | 0.05421              | -0.00002              | 0.03899              | 0.47416              | 0.05703                            | 0.70345                            | 8.74680                            | 0.70345                                | 0.00024        |
| JUL 24 2014                     | Run44  | 100um/10Hz | MkAn1_37 | 0.00009              | 0.00000               | 0.00297              | 0.00004              | 0.05595              | 0.00000               | 0.04025              | 0.48949              | 0.05553                            | 0.70353                            | 8.74905                            | 0.70339                                | 0.00029        |
| JUL 24 2014                     | Run45  | 100um/10Hz | MkAn1_38 | 0.00009              | -0.00001              | 0.00304              | 0.00004              | 0.05760              | 0.00000               | 0.04145              | 0.50413              | 0.05527                            | 0.70354                            | 8.75148                            | 0.70337                                | 0.00030        |
| JUL 24 2014                     | Run46  | 100um/10Hz | MkAn1_39 | 0.00014              | 0.00000               | 0.00379              | 0.00003              | 0.07127              | -0.00001              | 0.05127              | 0.62358              | 0.05560                            | 0.70356                            | 8.74834                            | 0.70342                                | 0.00025        |
| JUL 24 2014                     | Run47  | 100um/10Hz | MkAn1_40 | 0.00011              | -0.00001              | 0.00321              | 0.00003              | 0.06058              | -0.00002              | 0.04356              | 0.52978              | 0.05533                            | 0.70335                            | 8.74575                            | 0.70318                                | 0.00027        |
| <b>Average and error in 2SD</b> |        |            |          |                      |                       |                      |                      |                      |                       |                      |                      |                                    | <b>0.70343</b>                     | <b>0.00018</b>                     | <b>0.70341</b>                         | <b>0.00020</b> |
| JUL 24 2014                     | Run18  | 50um/10Hz  | MkAn1_11 | 0.00006              | -0.00002              | 0.00104              | 0.00000              | 0.01726              | 0.00000               | 0.01240              | 0.15087              | 0.06309                            | 0.7031                             | 8.7399                             | 0.7037                                 | 0.0009         |
| JUL 24 2014                     | Run19  | 50um/10Hz  | MkAn1_12 | 0.00004              | -0.00001              | 0.00091              | 0.00001              | 0.01684              | 0.00000               | 0.01212              | 0.14765              | 0.05659                            | 0.7034                             | 8.7675                             | 0.7033                                 | 0.0007         |
| JUL 24 2014                     | Run20  | 50um/10Hz  | MkAn1_13 | 0.00005              | 0.00000               | 0.00091              | 0.00000              | 0.01576              | 0.00000               | 0.01134              | 0.13800              | 0.06021                            | 0.7034                             | 8.7545                             | 0.7037                                 | 0.0007         |
| JUL 24 2014                     | Run21  | 50um/10Hz  | MkAn1_14 | 0.00006              | -0.00001              | 0.00097              | 0.00000              | 0.01642              | 0.00000               | 0.01180              | 0.14364              | 0.06172                            | 0.7033                             | 8.7484                             | 0.7038                                 | 0.0009         |
| JUL 24 2014                     | Run22  | 50um/10Hz  | MkAn1_15 | 0.00004              | -0.00001              | 0.00088              | 0.00000              | 0.01575              | -0.00002              | 0.01133              | 0.13789              | 0.05883                            | 0.7034                             | 8.7556                             | 0.7036                                 | 0.0006         |
| JUL 24 2014                     | Run23  | 50um/10Hz  | MkAn1_16 | 0.00005              | 0.00000               | 0.00102              | 0.00000              | 0.01759              | -0.00001              | 0.01263              | 0.15377              | 0.06061                            | 0.7027                             | 8.7427                             | 0.7031                                 | 0.0007         |
| JUL 24 2014                     | Run24  | 50um/10Hz  | MkAn1_17 | 0.00005              | 0.00000               | 0.00096              | 0.00000              | 0.01651              | -0.00001              | 0.01188              | 0.14448              | 0.06054                            | 0.7038                             | 8.7487                             | 0.7041                                 | 0.0008         |
| JUL 24 2014                     | Run25  | 50um/10Hz  | MkAn1_18 | 0.00003              | -0.00001              | 0.00091              | 0.00000              | 0.01614              | -0.00002              | 0.01161              | 0.14117              | 0.05901                            | 0.7040                             | 8.7489                             | 0.7042                                 | 0.0007         |
| JUL 24 2014                     | Run26  | 50um/10Hz  | MkAn1_19 | 0.00004              | -0.00002              | 0.00090              | 0.00000              | 0.01594              | -0.00001              | 0.01145              | 0.13936              | 0.05920                            | 0.7031                             | 8.7429                             | 0.7033                                 | 0.0008         |
| JUL 24 2014                     | Run27  | 50um/10Hz  | MkAn1_20 | 0.00005              | -0.00002              | 0.00089              | 0.00001              | 0.01567              | -0.00002              | 0.01127              | 0.13716              | 0.05951                            | 0.7031                             | 8.7512                             | 0.7033                                 | 0.0008         |
| JUL 24 2014                     | Run28  | 50um/10Hz  | MkAn1_21 | 0.00004              | 0.00001               | 0.00094              | 0.00001              | 0.01662              | -0.00001              | 0.01196              | 0.14547              | 0.05954                            | 0.7037                             | 8.7549                             | 0.7040                                 | 0.0006         |
| JUL 24 2014                     | Run29  | 50um/10Hz  | MkAn1_22 | 0.00003              | -0.00001              | 0.00100              | 0.00001              | 0.01784              | -0.00001              | 0.01285              | 0.15618              | 0.05895                            | 0.7043                             | 8.7549                             | 0.7045                                 | 0.0008         |
| JUL 24 2014                     | Run30  | 50um/10Hz  | MkAn1_23 | 0.00004              | -0.00001              | 0.00101              | 0.00000              | 0.01778              | -0.00002              | 0.01280              | 0.15572              | 0.05947                            | 0.7039                             | 8.7580                             | 0.7041                                 | 0.0008         |
| JUL 24 2014                     | Run31  | 50um/10Hz  | MkAn1_24 | 0.00004              | 0.00000               | 0.00100              | 0.00000              | 0.01786              | -0.00001              | 0.01285              | 0.15646              | 0.05889                            | 0.7032                             | 8.7572                             | 0.7033                                 | 0.0006         |
| JUL 24 2014                     | Run32  | 50um/10Hz  | MkAn1_25 | 0.00004              | -0.00002              | 0.00103              | 0.00000              | 0.01827              | -0.00001              | 0.01314              | 0.15986              | 0.05915                            | 0.7037                             | 8.7513                             | 0.7039                                 | 0.0007         |
| JUL 24 2014                     | Run33  | 50um/10Hz  | MkAn1_26 | 0.00005              | -0.00001              | 0.00101              | 0.00000              | 0.01797              | 0.00000               | 0.01293              | 0.15727              | 0.05857                            | 0.7041                             | 8.7532                             | 0.7042                                 | 0.0007         |
| JUL 24 2014                     | Run34  | 50um/10Hz  | MkAn1_27 | 0.00005              | -0.00002              | 0.00103              | 0.00001              | 0.01815              | 0.00000               | 0.01306              | 0.15886              | 0.05944                            | 0.7033                             | 8.7507                             | 0.7035                                 | 0.0008         |
| JUL 24 2014                     | Run35  | 50um/10Hz  | MkAn1_28 | 0.00005              | -0.00001              | 0.00101              | -0.00001             | 0.01812              | 0.00000               | 0.01303              | 0.15859              | 0.05855                            | 0.7033                             | 8.7516                             | 0.7034                                 | 0.0006         |
| JUL 24 2014                     | Run36  | 50um/10Hz  | MkAn1_29 | 0.00004              | 0.00000               | 0.00097              | 0.00002              | 0.01737              | -0.00001              | 0.01249              | 0.15195              | 0.05828                            | 0.7031                             | 8.7489                             | 0.7032                                 | 0.0009         |
| JUL 24 2014                     | Run37  | 50um/10Hz  | MkAn1_30 | 0.00004              | -0.00001              | 0.00100              | 0.00001              | 0.01779              | -0.00002              | 0.01279              | 0.15563              | 0.05903                            | 0.7029                             | 8.7466                             | 0.7031                                 | 0.0007         |
| JUL 24 2014                     | Run48  | 50um/10Hz  | MkAn1_41 | 0.00000              | -0.00001              | 0.00078              | 0.00003              | 0.01530              | -0.00002              | 0.01102              | 0.13388              | 0.05360                            | 0.7036                             | 8.7495                             | 0.7033                                 | 0.0009         |
| JUL 24 2014                     | Run49  |            |          |                      |                       |                      |                      |                      |                       |                      |                      |                                    |                                    |                                    |                                        |                |

|                                 |       |           |            |         |          |         |         |         |          |         |         |         |               |               |               |               |
|---------------------------------|-------|-----------|------------|---------|----------|---------|---------|---------|----------|---------|---------|---------|---------------|---------------|---------------|---------------|
| JUL 25 2014                     | Run23 | 50um/10Hz | BHVO-2G_2  | 0.00004 | 0.00001  | 0.00171 | 0.01014 | 0.03137 | -0.00001 | 0.02670 | 0.27526 | 0.05729 | 0.7037        | 8.7731        | 0.7036        | 0.0004        |
| JUL 25 2014                     | Run24 | 50um/10Hz | BHVO-2G_3  | 0.00003 | 0.00000  | 0.00177 | 0.01046 | 0.03214 | 0.00000  | 0.02737 | 0.28173 | 0.05776 | 0.7034        | 8.7655        | 0.7034        | 0.0005        |
| JUL 25 2014                     | Run25 | 50um/10Hz | BHVO-2G_4  | 0.00004 | 0.00000  | 0.00183 | 0.01097 | 0.03313 | 0.00000  | 0.02829 | 0.29048 | 0.05799 | 0.7035        | 8.7658        | 0.7036        | 0.0005        |
| JUL 25 2014                     | Run26 | 50um/10Hz | BHVO-2G_5  | 0.00004 | 0.00001  | 0.00180 | 0.01112 | 0.03335 | 0.00001  | 0.02851 | 0.29244 | 0.05666 | 0.7033        | 8.7664        | 0.7032        | 0.0004        |
| JUL 25 2014                     | Run27 | 50um/10Hz | BHVO-2G_6  | 0.00004 | 0.00000  | 0.00180 | 0.01109 | 0.03319 | -0.00001 | 0.02839 | 0.29111 | 0.05698 | 0.7035        | 8.7684        | 0.7034        | 0.0004        |
| JUL 25 2014                     | Run28 | 50um/10Hz | BHVO-2G_7  | 0.00004 | 0.00000  | 0.00182 | 0.01108 | 0.03305 | -0.00001 | 0.02828 | 0.28988 | 0.05758 | 0.7034        | 8.7694        | 0.7034        | 0.0005        |
| JUL 25 2014                     | Run29 | 50um/10Hz | BHVO-2G_8  | 0.00004 | -0.00001 | 0.00184 | 0.01137 | 0.03399 | 0.00000  | 0.02906 | 0.29807 | 0.05669 | 0.7029        | 8.7679        | 0.7028        | 0.0005        |
| JUL 25 2014                     | Run30 | 50um/10Hz | BHVO-2G_9  | 0.00002 | 0.00000  | 0.00189 | 0.01144 | 0.03454 | 0.00000  | 0.02950 | 0.30276 | 0.05722 | 0.7036        | 8.7625        | 0.7036        | 0.0005        |
| JUL 25 2014                     | Run31 | 50um/10Hz | BHVO-2G_10 | 0.00003 | 0.00001  | 0.00191 | 0.01156 | 0.03542 | 0.00000  | 0.03017 | 0.31038 | 0.05662 | 0.7035        | 8.7620        | 0.7034        | 0.0004        |
| JUL 25 2014                     | Run32 | 50um/10Hz | BHVO-2G_11 | 0.00004 | 0.00002  | 0.00200 | 0.01189 | 0.03654 | -0.00002 | 0.03112 | 0.32023 | 0.05731 | 0.7036        | 8.7641        | 0.7036        | 0.0005        |
| JUL 25 2014                     | Run33 | 50um/10Hz | BHVO-2G_12 | 0.00005 | 0.00002  | 0.00201 | 0.01185 | 0.03657 | 0.00001  | 0.03112 | 0.32060 | 0.05774 | 0.7035        | 8.7671        | 0.7035        | 0.0005        |
| JUL 25 2014                     | Run34 | 50um/10Hz | BHVO-2G_13 | 0.00003 | 0.00001  | 0.00197 | 0.01177 | 0.03623 | 0.00000  | 0.03085 | 0.31748 | 0.05699 | 0.7036        | 8.7638        | 0.7036        | 0.0005        |
| JUL 25 2014                     | Run35 | 50um/10Hz | BHVO-2G_14 | 0.00004 | 0.00000  | 0.00197 | 0.01176 | 0.03625 | 0.00000  | 0.03086 | 0.31772 | 0.05682 | 0.7037        | 8.7644        | 0.7036        | 0.0005        |
| JUL 25 2014                     | Run36 | 50um/10Hz | BHVO-2G_15 | 0.00002 | 0.00001  | 0.00193 | 0.01140 | 0.03568 | 0.00000  | 0.03028 | 0.31249 | 0.05656 | 0.7031        | 8.7587        | 0.7030        | 0.0005        |
| JUL 25 2014                     | Run37 | 50um/10Hz | BHVO-2G_16 | 0.00005 | 0.00001  | 0.00197 | 0.01179 | 0.03625 | 0.00001  | 0.03086 | 0.31754 | 0.05706 | 0.7035        | 8.7619        | 0.7034        | 0.0006        |
| JUL 25 2014                     | Run38 | 50um/10Hz | BHVO-2G_17 | 0.00004 | 0.00000  | 0.00197 | 0.01202 | 0.03647 | -0.00001 | 0.03113 | 0.31954 | 0.05670 | 0.7040        | 8.7627        | 0.7039        | 0.0005        |
| JUL 25 2014                     | Run39 | 50um/10Hz | BHVO-2G_18 | 0.00004 | 0.00001  | 0.00198 | 0.01199 | 0.03616 | 0.00000  | 0.03090 | 0.31694 | 0.05736 | 0.7039        | 8.7637        | 0.7039        | 0.0005        |
| JUL 25 2014                     | Run40 | 50um/10Hz | BHVO-2G_19 | 0.00004 | 0.00000  | 0.00198 | 0.01213 | 0.03649 | -0.00001 | 0.03117 | 0.31983 | 0.05693 | 0.7033        | 8.7641        | 0.7033        | 0.0006        |
| JUL 25 2014                     | Run41 | 50um/10Hz | BHVO-2G_20 | 0.00004 | 0.00002  | 0.00196 | 0.01230 | 0.03630 | 0.00001  | 0.03112 | 0.31829 | 0.05657 | 0.7035        | 8.7669        | 0.7034        | 0.0005        |
| JUL 26 2014                     | Run20 | 50um/10Hz | BHVO-2G_1  | 0.00004 | 0.00001  | 0.00173 | 0.01025 | 0.03169 | -0.00001 | 0.02698 | 0.27806 | 0.05718 | 0.7036        | 8.7748        | 0.7036        | 0.0005        |
| JUL 26 2014                     | Run21 | 50um/10Hz | BHVO-2G_2  | 0.00001 | 0.00002  | 0.00164 | 0.01011 | 0.03011 | -0.00001 | 0.02576 | 0.26406 | 0.05721 | 0.7031        | 8.7688        | 0.7031        | 0.0006        |
| JUL 26 2014                     | Run22 | 50um/10Hz | BHVO-2G_3  | 0.00003 | -0.00001 | 0.00168 | 0.01031 | 0.03109 | 0.00000  | 0.02655 | 0.27264 | 0.05665 | 0.7032        | 8.7696        | 0.7032        | 0.0006        |
| JUL 26 2014                     | Run23 | 50um/10Hz | BHVO-2G_4  | 0.00006 | 0.00001  | 0.00165 | 0.00976 | 0.03003 | 0.00001  | 0.02557 | 0.26335 | 0.05751 | 0.7032        | 8.7687        | 0.7033        | 0.0006        |
| JUL 26 2014                     | Run24 | 50um/10Hz | BHVO-2G_5  | 0.00003 | 0.00000  | 0.00180 | 0.01007 | 0.03274 | -0.00001 | 0.02766 | 0.28722 | 0.05756 | 0.7035        | 8.7724        | 0.7036        | 0.0005        |
| JUL 26 2014                     | Run25 | 50um/10Hz | BHVO-2G_6  | 0.00004 | 0.00001  | 0.00185 | 0.01124 | 0.03389 | 0.00000  | 0.02895 | 0.29703 | 0.05724 | 0.7036        | 8.7641        | 0.7036        | 0.0006        |
| JUL 26 2014                     | Run26 | 50um/10Hz | BHVO-2G_7  | 0.00005 | 0.00001  | 0.00181 | 0.01091 | 0.03292 | 0.00000  | 0.02813 | 0.28872 | 0.05779 | 0.7035        | 8.7687        | 0.7036        | 0.0005        |
| JUL 26 2014                     | Run27 | 50um/10Hz | BHVO-2G_8  | 0.00004 | 0.00000  | 0.00177 | 0.01066 | 0.03255 | 0.00000  | 0.02776 | 0.28540 | 0.05701 | 0.7038        | 8.7692        | 0.7038        | 0.0005        |
| JUL 26 2014                     | Run28 | 50um/10Hz | BHVO-2G_9  | 0.00005 | 0.00000  | 0.00180 | 0.01056 | 0.03273 | 0.00000  | 0.02784 | 0.28679 | 0.05747 | 0.7037        | 8.7635        | 0.7037        | 0.0005        |
| JUL 26 2014                     | Run29 | 50um/10Hz | BHVO-2G_10 | 0.00004 | 0.00001  | 0.00174 | 0.01059 | 0.03213 | -0.00001 | 0.02742 | 0.28170 | 0.05679 | 0.7033        | 8.7666        | 0.7033        | 0.0004        |
| JUL 26 2014                     | Run30 | 50um/10Hz | BHVO-2G_11 | 0.00003 | 0.00000  | 0.00169 | 0.01040 | 0.03132 | 0.00000  | 0.02675 | 0.27462 | 0.05658 | 0.7031        | 8.7678        | 0.7031        | 0.0006        |
| JUL 26 2014                     | Run31 | 50um/10Hz | BHVO-2G_12 | 0.00003 | -0.00001 | 0.00176 | 0.01090 | 0.03241 | -0.00001 | 0.02776 | 0.28429 | 0.05711 | 0.7037        | 8.7721        | 0.7037        | 0.0004        |
| JUL 26 2014                     | Run32 | 50um/10Hz | BHVO-2G_13 | 0.00003 | 0.00002  | 0.00166 | 0.00975 | 0.03039 | -0.00001 | 0.02585 | 0.26669 | 0.05744 | 0.7039        | 8.7747        | 0.7040        | 0.0006        |
| JUL 26 2014                     | Run33 | 50um/10Hz | BHVO-2G_14 | 0.00002 | 0.00000  | 0.00160 | 0.00968 | 0.02946 | 0.00001  | 0.02514 | 0.25853 | 0.05689 | 0.7035        | 8.7743        | 0.7035        | 0.0005        |
| JUL 26 2014                     | Run34 | 50um/10Hz | BHVO-2G_15 | 0.00005 | 0.00000  | 0.00157 | 0.00939 | 0.02855 | 0.00001  | 0.02436 | 0.25047 | 0.05750 | 0.7033        | 8.7700        | 0.7033        | 0.0007        |
| JUL 26 2014                     | Run35 | 50um/10Hz | BHVO-2G_16 | 0.00003 | 0.00000  | 0.00172 | 0.01003 | 0.03178 | -0.00002 | 0.02694 | 0.27893 | 0.05692 | 0.7032        | 8.7762        | 0.7032        | 0.0004        |
| JUL 26 2014                     | Run36 | 50um/10Hz | BHVO-2G_17 | 0.00004 | 0.00001  | 0.00169 | 0.00988 | 0.03129 | -0.00002 | 0.02654 | 0.27470 | 0.05663 | 0.7033        | 8.7765        | 0.7032        | 0.0005        |
| JUL 26 2014                     | Run37 | 50um/10Hz | BHVO-2G_18 | 0.00005 | 0.00001  | 0.00161 | 0.00980 | 0.02958 | 0.00000  | 0.02528 | 0.25952 | 0.05689 | 0.7036        | 8.7734        | 0.7036        | 0.0006        |
| JUL 26 2014                     | Run38 | 50um/10Hz | BHVO-2G_19 | 0.00002 | -0.00001 | 0.00160 | 0.00956 | 0.02947 | -0.00001 | 0.02510 | 0.25849 | 0.05685 | 0.7036        | 8.7706        | 0.7036        | 0.0007        |
| JUL 26 2014                     | Run39 | 50um/10Hz | BHVO-2G_20 | 0.00002 | 0.00001  | 0.00160 | 0.00965 | 0.02963 | 0.00000  | 0.02525 | 0.25983 | 0.05653 | 0.7038        | 8.7679        | 0.7037        | 0.0005        |
| JUN 02 2014                     | Run34 | 50um/10Hz | BHVO-2G-16 | 0.00005 | 0.00002  | 0.00214 | 0.01045 | 0.03911 | 0.00000  | 0.03238 | 0.34279 | 0.05733 | 0.7035        | 8.7642        | 0.7035        | 0.0004        |
| JUN 02 2014                     | Run35 | 50um/10Hz | BHVO-2G-17 | 0.00005 | 0.00000  | 0.00203 | 0.00994 | 0.03753 | 0.00000  | 0.03104 | 0.32896 | 0.05666 | 0.7036        | 8.7644        | 0.7036        | 0.0005        |
| JUN 02 2014                     | Run36 | 50um/10Hz | BHVO-2G-18 | 0.00004 | -0.00001 | 0.00201 | 0.00995 | 0.03722 | -0.00002 | 0.03082 | 0.32640 | 0.05673 | 0.7033        | 8.7696        | 0.7033        | 0.0004        |
| JUN 02 2014                     | Run37 | 50um/10Hz | BHVO-2G-19 | 0.00004 | 0.00000  | 0.00199 | 0.01002 | 0.03672 | -0.00001 | 0.03048 | 0.32183 | 0.05667 | 0.7032        | 8.7640        | 0.7032        | 0.0004        |
| JUN 02 2014                     | Run38 | 50um/10Hz | BHVO-2G-20 | 0.00003 | 0.00000  | 0.00199 | 0.00998 | 0.03663 | -0.00001 | 0.03041 | 0.32103 | 0.05701 | 0.7037        | 8.7653        | 0.7037        | 0.0005        |
| JUN 02 2014                     | Run40 | 50um/10Hz | BHVO-2G-21 | 0.00003 | 0.00002  | 0.00212 | 0.01025 | 0.03865 | 0.00000  | 0.03198 | 0.33874 | 0.05744 | 0.7036        | 8.7631        | 0.7036        | 0.0004        |
| JUN 02 2014                     | Run41 | 50um/10Hz | BHVO-2G-22 | 0.00005 | 0.00001  | 0.00202 | 0.01004 | 0.03731 | 0.00000  | 0.03092 | 0.32705 | 0.05676 | 0.7034        | 8.7656        | 0.7034        | 0.0004        |
| JUN 02 2014                     | Run42 | 50um/10Hz | BHVO-2G-23 | 0.00005 | 0.00001  | 0.00203 | 0.01021 | 0.03748 | -0.00001 | 0.03111 | 0.32852 | 0.05679 | 0.7035        | 8.7654        | 0.7035        | 0.0004        |
| JUN 02 2014                     | Run43 | 50um/10Hz | BHVO-2G-24 | 0.00005 | 0.00002  | 0.00203 | 0.01025 | 0.03765 | 0.00001  | 0.03126 | 0.33002 | 0.05658 | 0.7035        | 8.7647        | 0.7035        | 0.0004        |
| JUN 02 2014                     | Run44 | 50um/10Hz | BHVO-2G-25 | 0.00004 | 0.00000  | 0.00210 | 0.01045 | 0.03884 | 0.00000  | 0.03219 | 0.34030 | 0.05672 | 0.7038        | 8.7624        | 0.7038        | 0.0003        |
| JUN 02 2014                     | Run46 | 50um/10Hz | BHVO-2G-26 | 0.00003 | -0.00001 | 0.00195 | 0.00972 | 0.03563 | -0.00001 | 0.02958 | 0.31218 | 0.05733 | 0.7037        | 8.7612        | 0.7037        | 0.0005        |
| JUN 02 2014                     | Run47 | 50um/10Hz | BHVO-2G-27 | 0.00004 | 0.00001  | 0.00199 | 0.00973 | 0.03636 | 0.00000  | 0.03013 | 0.31883 | 0.05724 | 0.7037        | 8.7693        | 0.7037        | 0.0005        |
| JUN 02 2014                     | Run48 | 50um/10Hz | BHVO-2G-28 | 0.00004 | 0.00001  | 0.00210 | 0.01009 | 0.03880 | 0.00000  | 0.03202 | 0.34012 | 0.05673 | 0.7035        | 8.7656        | 0.7035        | 0.0004        |
| JUN 02 2014                     | Run49 | 50um/10Hz | BHVO-2G-29 | 0.00005 | 0.00000  | 0.00217 | 0.01042 | 0.03996 | -0.00001 | 0.03299 | 0.35036 | 0.05685 | 0.7035        | 8.7679        | 0.7035        | 0.0004        |
| JUN 02 2014                     | Run50 | 50um/10Hz | BHVO-2G-30 | 0.00004 | 0.00000  | 0.00195 | 0.00989 | 0.03595 | 0.00000  | 0.02988 | 0.31518 | 0.05688 | 0.7032        | 8.7685        | 0.7032        | 0.0005        |
| <b>Average and error in 2SD</b> |       |           |            |         |          |         |         |         |          |         |         |         | <b>0.7035</b> | <b>0.0004</b> | <b>0.7035</b> | <b>0.0005</b> |

| Day         | Run ID | Crater     | Sample   | <sup>83</sup> Kr (V) | <sup>83.5</sup> M (V) | <sup>84</sup> Sr (V) | <sup>85</sup> Rb (V) | <sup>86</sup> Sr (V) | <sup>86.5</sup> M (V) | <sup>87</sup> Sr (V) | <sup>88</sup> Sr (V) | <sup>84</sup> Sr/ <sup>86</sup> Sr | <sup>87</sup> Sr/ <sup>86</sup> Sr | <sup>88</sup> Sr/ <sup>86</sup> Sr | <sup>87</sup> Sr/ <sup>86</sup> Sr cor | 2SE     |
|-------------|--------|------------|----------|----------------------|-----------------------|----------------------|----------------------|----------------------|-----------------------|----------------------|----------------------|------------------------------------|------------------------------------|------------------------------------|----------------------------------------|---------|
| JUL 27 2014 | Run2   | 100um/10Hz | BCR-2G_1 | 0.00014              | 0.00003               | 0.00432              | 0.13576              | 0.08026              | -0.00001              | 0.11296              | 0.70442              | 0.05648                            | 0.70488                            | 8.77626                            | 0.70488                                | 0.00052 |
| JUL 27 2014 | Run3   | 100um/10Hz | BCR-2G_2 | 0.00017              | 0.00003               | 0.00433              | 0.13609              | 0.07974              | 0.00002               | 0.11274              | 0.69979              | 0.05694                            | 0.70523                            | 8.77537                            | 0.70524                                | 0.00039 |
| JUL 27 2014 | Run4   | 100um/10Hz | BCR-2G_3 | 0.00015              | 0.00005               | 0.00432              | 0.13606              | 0.07953              | 0.00001               | 0.11257              | 0.69792              | 0.05702                            | 0.70512                            | 8.77507                            | 0.70513                                | 0.00042 |
| JUL 27 2014 | Run5   | 100um/10Hz | BCR-2G_4 | 0.00016              | 0.00003               | 0.00436              | 0.13599              | 0.08056              | -0.00001              | 0.11327              | 0.70693              | 0.05678                            | 0.70472                            | 8.77516                            | 0.70497                                | 0.00049 |
| JUL 27 2014 | Run7   | 100um/10Hz | BCR-2G_6 | 0.00014              | 0.00002               | 0.00441              | 0.13720              | 0.08090              | 0.00001               | 0.11397</            |                      |                                    |                                    |                                    |                                        |         |

|                                 |           |           |          |          |         |         |         |          |         |         |         |               |               |               |               |
|---------------------------------|-----------|-----------|----------|----------|---------|---------|---------|----------|---------|---------|---------|---------------|---------------|---------------|---------------|
| AUG 18 2014 Run05               | 50um/10Hz | BCR-2G_4  | 0.00005  | 0.00000  | 0.00171 | 0.05685 | 0.03161 | 0.00000  | 0.04580 | 0.27715 | 0.05679 | 0.7044        | 8.7663        | 0.7046        | 0.0007        |
| AUG 18 2014 Run06               | 50um/10Hz | BCR-2G_5  | 0.00003  | 0.00001  | 0.00173 | 0.05844 | 0.03230 | -0.00001 | 0.04695 | 0.28284 | 0.05606 | 0.7049        | 8.7585        | 0.7049        | 0.0010        |
| AUG 18 2014 Run08               | 50um/10Hz | BCR-2G_6  | 0.00003  | 0.00001  | 0.00170 | 0.05887 | 0.03265 | 0.00000  | 0.04737 | 0.28590 | 0.05452 | 0.7049        | 8.7569        | 0.7047        | 0.0009        |
| AUG 18 2014 Run09               | 50um/10Hz | BCR-2G_7  | 0.00003  | 0.00000  | 0.00174 | 0.05903 | 0.03292 | 0.00001  | 0.04762 | 0.28812 | 0.05525 | 0.7050        | 8.7532        | 0.7048        | 0.0007        |
| AUG 18 2014 Run10               | 50um/10Hz | BCR-2G_8  | 0.00004  | 0.00001  | 0.00173 | 0.05955 | 0.03272 | 0.00000  | 0.04769 | 0.28640 | 0.05529 | 0.7048        | 8.7547        | 0.7046        | 0.0006        |
| AUG 18 2014 Run11               | 50um/10Hz | BCR-2G_9  | 0.00004  | 0.00002  | 0.00180 | 0.06027 | 0.03293 | -0.00001 | 0.04810 | 0.28802 | 0.05727 | 0.7042        | 8.7481        | 0.7042        | 0.0006        |
| AUG 18 2014 Run12               | 50um/10Hz | BCR-2G_10 | 0.00007  | 0.00002  | 0.00193 | 0.06047 | 0.03322 | -0.00001 | 0.04837 | 0.29021 | 0.06082 | 0.7041        | 8.7383        | 0.7050        | 0.0005        |
| AUG 18 2014 Run14               | 50um/10Hz | BCR-2G_11 | 0.00004  | 0.00001  | 0.00159 | 0.05436 | 0.03018 | 0.00000  | 0.04375 | 0.26427 | 0.05519 | 0.7050        | 8.7563        | 0.7049        | 0.0007        |
| AUG 18 2014 Run15               | 50um/10Hz | BCR-2G_12 | 0.00005  | 0.00003  | 0.00164 | 0.05442 | 0.02978 | 0.00000  | 0.04347 | 0.26063 | 0.05746 | 0.7048        | 8.7522        | 0.7049        | 0.0007        |
| AUG 18 2014 Run16               | 50um/10Hz | BCR-2G_13 | 0.00004  | 0.00000  | 0.00167 | 0.05784 | 0.03153 | 0.00000  | 0.04613 | 0.27604 | 0.05530 | 0.7051        | 8.7556        | 0.7049        | 0.0006        |
| AUG 18 2014 Run17               | 50um/10Hz | BCR-2G_14 | 0.00002  | 0.00000  | 0.00163 | 0.05638 | 0.03072 | 0.00000  | 0.04495 | 0.26905 | 0.05558 | 0.7048        | 8.7570        | 0.7047        | 0.0007        |
| AUG 18 2014 Run18               | 50um/10Hz | BCR-2G_15 | 0.00002  | 0.00000  | 0.00165 | 0.05704 | 0.03117 | 0.00000  | 0.04556 | 0.27297 | 0.05548 | 0.7054        | 8.7570        | 0.7053        | 0.0006        |
| AUG 18 2014 Run20               | 50um/10Hz | BCR-2G_16 | 0.00003  | 0.00002  | 0.00169 | 0.06024 | 0.03288 | 0.00001  | 0.04810 | 0.28811 | 0.05375 | 0.7060        | 8.7631        | 0.7057        | 0.0007        |
| AUG 18 2014 Run21               | 50um/10Hz | BCR-2G_17 | 0.00005  | 0.00001  | 0.00178 | 0.06200 | 0.03338 | 0.00000  | 0.04915 | 0.29231 | 0.05579 | 0.7055        | 8.7576        | 0.7054        | 0.0006        |
| AUG 18 2014 Run22               | 50um/10Hz | BCR-2G_18 | 0.00004  | 0.00001  | 0.00179 | 0.05980 | 0.03244 | 0.00000  | 0.04758 | 0.28383 | 0.05774 | 0.7057        | 8.7499        | 0.7058        | 0.0006        |
| AUG 18 2014 Run23               | 50um/10Hz | BCR-2G_19 | 0.00003  | 0.00002  | 0.00172 | 0.05990 | 0.03289 | 0.00000  | 0.04794 | 0.28796 | 0.05477 | 0.7054        | 8.7561        | 0.7051        | 0.0006        |
| AUG 18 2014 Run24               | 50um/10Hz | BCR-2G_20 | -0.00001 | 0.00002  | 0.00151 | 0.05992 | 0.03274 | -0.00001 | 0.04788 | 0.28708 | 0.04766 | 0.7063        | 8.7714        | 0.7054        | 0.0005        |
| AUG 18 2014 Run26               | 50um/10Hz | BCR-2G_21 | 0.00004  | 0.00000  | 0.00181 | 0.05990 | 0.03346 | 0.00000  | 0.04834 | 0.29274 | 0.05646 | 0.7056        | 8.7496        | 0.7055        | 0.0006        |
| AUG 18 2014 Run27               | 50um/10Hz | BCR-2G_22 | 0.00006  | 0.00002  | 0.00179 | 0.05920 | 0.03300 | 0.00001  | 0.04772 | 0.28875 | 0.05685 | 0.7055        | 8.7502        | 0.7055        | 0.0004        |
| AUG 18 2014 Run28               | 50um/10Hz | BCR-2G_23 | 0.00004  | 0.00000  | 0.00179 | 0.06155 | 0.03309 | 0.00000  | 0.04874 | 0.28958 | 0.05656 | 0.7054        | 8.7508        | 0.7053        | 0.0006        |
| AUG 18 2014 Run29               | 50um/10Hz | BCR-2G_24 | 0.00003  | 0.00001  | 0.00140 | 0.04941 | 0.02717 | 0.00000  | 0.03958 | 0.23797 | 0.05406 | 0.7058        | 8.7578        | 0.7055        | 0.0007        |
| AUG 18 2014 Run30               | 50um/10Hz | BCR-2G_25 | 0.00005  | 0.00000  | 0.00155 | 0.05109 | 0.02840 | 0.00001  | 0.04114 | 0.24857 | 0.05704 | 0.7058        | 8.7528        | 0.7058        | 0.0007        |
| AUG 18 2014 Run32               | 50um/10Hz | BCR-2G_26 | 0.00002  | 0.00002  | 0.00156 | 0.05429 | 0.02983 | 0.00000  | 0.04347 | 0.26122 | 0.05497 | 0.7053        | 8.7581        | 0.7051        | 0.0008        |
| AUG 18 2014 Run33               | 50um/10Hz | BCR-2G_27 | 0.00005  | 0.00002  | 0.00149 | 0.04995 | 0.02801 | -0.00001 | 0.04039 | 0.24503 | 0.05572 | 0.7054        | 8.7500        | 0.7053        | 0.0007        |
| AUG 18 2014 Run34               | 50um/10Hz | BCR-2G_28 | 0.00003  | 0.00001  | 0.00147 | 0.05002 | 0.02799 | -0.00001 | 0.04041 | 0.24494 | 0.05502 | 0.7054        | 8.7529        | 0.7052        | 0.0006        |
| AUG 18 2014 Run35               | 50um/10Hz | BCR-2G_29 | 0.00002  | -0.00001 | 0.00149 | 0.05062 | 0.02845 | 0.00000  | 0.04098 | 0.24906 | 0.05463 | 0.7050        | 8.7553        | 0.7048        | 0.0007        |
| AUG 18 2014 Run36               | 50um/10Hz | BCR-2G_30 | 0.00005  | 0.00002  | 0.00157 | 0.05321 | 0.02882 | 0.00000  | 0.04230 | 0.25213 | 0.05713 | 0.7056        | 8.7480        | 0.7056        | 0.0007        |
| AUG 18 2014 Run38               | 50um/10Hz | BCR-2G_31 | 0.00004  | 0.00000  | 0.00148 | 0.05012 | 0.02778 | -0.00001 | 0.04030 | 0.24328 | 0.05586 | 0.7052        | 8.7566        | 0.7051        | 0.0007        |
| AUG 18 2014 Run39               | 50um/10Hz | BCR-2G_32 | 0.00003  | 0.00000  | 0.00142 | 0.04955 | 0.02739 | 0.00001  | 0.03978 | 0.23976 | 0.05409 | 0.7049        | 8.7556        | 0.7047        | 0.0008        |
| AUG 18 2014 Run40               | 50um/10Hz | BCR-2G_33 | 0.00004  | 0.00001  | 0.00152 | 0.05214 | 0.02845 | 0.00000  | 0.04159 | 0.24896 | 0.05584 | 0.7051        | 8.7507        | 0.7050        | 0.0006        |
| AUG 18 2014 Run41               | 50um/10Hz | BCR-2G_34 | 0.00001  | 0.00001  | 0.00137 | 0.05178 | 0.02867 | 0.00000  | 0.04165 | 0.25133 | 0.04997 | 0.7059        | 8.7651        | 0.7052        | 0.0008        |
| AUG 18 2014 Run42               | 50um/10Hz | BCR-2G_35 | 0.00003  | 0.00002  | 0.00163 | 0.05348 | 0.02997 | 0.00000  | 0.04322 | 0.26214 | 0.05689 | 0.7051        | 8.7485        | 0.7050        | 0.0006        |
| AUG 18 2014 Run44               | 50um/10Hz | BCR-2G_36 | 0.00003  | 0.00002  | 0.00168 | 0.05801 | 0.03173 | 0.00000  | 0.04635 | 0.27765 | 0.05534 | 0.7057        | 8.7515        | 0.7056        | 0.0007        |
| AUG 18 2014 Run45               | 50um/10Hz | BCR-2G_37 | 0.00004  | 0.00001  | 0.00162 | 0.05264 | 0.02985 | -0.00002 | 0.04278 | 0.26098 | 0.05691 | 0.7049        | 8.7446        | 0.7049        | 0.0005        |
| AUG 18 2014 Run46               | 50um/10Hz | BCR-2G_38 | 0.00005  | 0.00001  | 0.00160 | 0.05318 | 0.02936 | 0.00002  | 0.04267 | 0.25674 | 0.05683 | 0.7054        | 8.7436        | 0.7054        | 0.0007        |
| AUG 18 2014 Run47               | 50um/10Hz | BCR-2G_39 | 0.00004  | 0.00001  | 0.00158 | 0.05438 | 0.02924 | -0.00001 | 0.04306 | 0.25587 | 0.05664 | 0.7052        | 8.7498        | 0.7052        | 0.0006        |
| AUG 18 2014 Run48               | 50um/10Hz | BCR-2G_40 | 0.00002  | 0.00003  | 0.00162 | 0.05398 | 0.02945 | 0.00000  | 0.04303 | 0.25764 | 0.05737 | 0.7047        | 8.7474        | 0.7047        | 0.0006        |
| AUG 18 2014 Run50               | 50um/10Hz | BCR-2G_41 | 0.00003  | 0.00001  | 0.00163 | 0.05523 | 0.03019 | 0.00001  | 0.04409 | 0.26414 | 0.05634 | 0.7053        | 8.7508        | 0.7052        | 0.0005        |
| AUG 18 2014 Run51               | 50um/10Hz | BCR-2G_42 | 0.00005  | 0.00001  | 0.00169 | 0.05623 | 0.03109 | 0.00000  | 0.04515 | 0.27201 | 0.05679 | 0.7055        | 8.7501        | 0.7055        | 0.0006        |
| AUG 18 2014 Run52               | 50um/10Hz | BCR-2G_43 | 0.00003  | 0.00002  | 0.00170 | 0.05725 | 0.03141 | -0.00001 | 0.04580 | 0.27488 | 0.05648 | 0.7055        | 8.7504        | 0.7055        | 0.0007        |
| AUG 18 2014 Run53               | 50um/10Hz | BCR-2G_44 | 0.00002  | 0.00001  | 0.00169 | 0.05870 | 0.03214 | 0.00000  | 0.04692 | 0.28136 | 0.05501 | 0.7056        | 8.7540        | 0.7054        | 0.0005        |
| AUG 18 2014 Run54               | 50um/10Hz | BCR-2G_45 | 0.00004  | 0.00001  | 0.00164 | 0.05592 | 0.03103 | 0.00000  | 0.04498 | 0.27158 | 0.05548 | 0.7055        | 8.7537        | 0.7054        | 0.0005        |
| AUG 18 2014 Run56               | 50um/10Hz | BCR-2G_46 | 0.00004  | 0.00002  | 0.00159 | 0.05421 | 0.03041 | -0.00001 | 0.04385 | 0.26618 | 0.05469 | 0.7055        | 8.7542        | 0.7053        | 0.0006        |
| AUG 18 2014 Run57               | 50um/10Hz | BCR-2G_47 | 0.00003  | 0.00001  | 0.00169 | 0.05576 | 0.03096 | 0.00001  | 0.04488 | 0.27096 | 0.05726 | 0.7056        | 8.7512        | 0.7056        | 0.0007        |
| AUG 18 2014 Run58               | 50um/10Hz | BCR-2G_48 | 0.00003  | 0.00001  | 0.00157 | 0.05413 | 0.02990 | 0.00000  | 0.04343 | 0.26160 | 0.05489 | 0.7053        | 8.7505        | 0.7051        | 0.0007        |
| AUG 18 2014 Run59               | 50um/10Hz | BCR-2G_49 | 0.00002  | 0.00001  | 0.00161 | 0.05519 | 0.03013 | 0.00001  | 0.04404 | 0.26366 | 0.05590 | 0.7052        | 8.7498        | 0.7051        | 0.0010        |
| AUG 18 2014 Run60               | 50um/10Hz | BCR-2G_50 | 0.00004  | 0.00001  | 0.00180 | 0.06124 | 0.03307 | 0.00000  | 0.04860 | 0.28928 | 0.05701 | 0.7054        | 8.7486        | 0.7054        | 0.0005        |
| <b>Average and error in 2SD</b> |           |           |          |          |         |         |         |          |         |         |         | <b>0.7052</b> | <b>0.0012</b> | <b>0.7051</b> | <b>0.0008</b> |

| Day                             | Run ID     | Crater | Sample | <sup>83</sup> Kr (V) | <sup>83.5</sup> M (V) | <sup>84</sup> Sr (V) | <sup>85</sup> Rb (V) | <sup>86</sup> Sr (V) | <sup>86.5</sup> M (V) | <sup>87</sup> Sr (V) | <sup>88</sup> Sr (V) | <sup>84</sup> Sr/ <sup>86</sup> Sr | <sup>87</sup> Sr/ <sup>86</sup> Sr | <sup>88</sup> Sr/ <sup>86</sup> Sr | <sup>87</sup> Sr/ <sup>86</sup> Sr cor | 2SE     |
|---------------------------------|------------|--------|--------|----------------------|-----------------------|----------------------|----------------------|----------------------|-----------------------|----------------------|----------------------|------------------------------------|------------------------------------|------------------------------------|----------------------------------------|---------|
| AUG 05 2014 Run09               | 100um/10Hz | KL2-G  | KL2-G  | 0.00013              | 0.00001               | 0.00393              | 0.01973              | 0.07168              | 0.00000               | 0.05970              | 0.63032              | 0.05758                            | 0.70350                            | 8.79421                            | 0.70355                                | 0.00057 |
| AUG 05 2014 Run10               | 100um/10Hz | KL2-G  | KL2-G  | 0.00012              | 0.00003               | 0.00384              | 0.01932              | 0.07118              | 0.00001               | 0.05917              | 0.62591              | 0.05676                            | 0.70355                            | 8.79388                            | 0.70353                                | 0.00047 |
| AUG 05 2014 Run11               | 100um/10Hz | KL2-G  | KL2-G  | 0.00011              | 0.00002               | 0.00367              | 0.01885              | 0.06796              | 0.00001               | 0.05665              | 0.59742              | 0.05673                            | 0.70359                            | 8.79029                            | 0.70356                                | 0.00059 |
| AUG 05 2014 Run12               | 100um/10Hz | KL2-G  | KL2-G  | 0.00013              | 0.00001               | 0.00376              | 0.01982              | 0.06933              | 0.00000               | 0.05803              | 0.60958              | 0.05695                            | 0.70341                            | 8.79209                            | 0.70340                                | 0.00054 |
| AUG 05 2014 Run13               | 100um/10Hz | KL2-G  | KL2-G  | 0.00012              | 0.00001               | 0.00378              | 0.02076              | 0.07015              | 0.00002               | 0.05902              | 0.61687              | 0.05657                            | 0.70357                            | 8.79367                            | 0.70353                                | 0.00063 |
| <b>Average and error in 2SD</b> |            |        |        |                      |                       |                      |                      |                      |                       |                      |                      | <b>0.70352</b>                     | <b>0.00014</b>                     | <b>0.70351</b>                     | <b>0.00013</b>                         |         |
| AUG 05 2014 Run15               | 100um/10Hz | ML3B-G | ML3B-G | 0.00011              | 0.00001               | 0.00293              | 0.01314              | 0.05360              | 0.00000               | 0.04400              | 0.47108              | 0.05741                            | 0.70406                            | 8.78952                            | 0.70410                                | 0.00076 |
| AUG 05 2014 Run17               | 100um/10Hz | ML3B-G | ML3B-G | 0.00008              | 0.00001               | 0.00245              | 0.01161              | 0.04579              | 0.00001               | 0.03774              | 0.40244              | 0.05632                            | 0.70396                            | 8.78979                            | 0.70389                                | 0.00094 |
| AUG 05 2014 Run18               | 100um/10Hz | ML3B-G | ML3B-G | 0.00009              | 0.00002               | 0.00249              | 0.01159              | 0.04615              | -0.00001              | 0.03801              | 0.40592              | 0.05662                            | 0.70403                            | 8.79701                            | 0.70399                                | 0.00086 |
| AUG 05 2014 Run21               | 50um/10Hz  | ML3B-G | ML3B-G | 0.00012              | 0.00001               | 0.00294              | 0.01308              | 0.05349              | -0.00001              | 0.04388              | 0.47018              | 0.05780                            | 0.70375                            | 8.78968                            | 0.70377                                | 0.00071 |
| AUG 05 2014 Run22               | 50um/10Hz  | ML3B-G | ML3B-G | 0.00010              | 0.00001               | 0.00298              | 0.01356              | 0.05483              | -0.00001              | 0.04505              | 0.48194              | 0.05702                            | 0.70385                            | 8.78905                            | 0.70380                                | 0.00067 |
| AUG 05 2014 Run23               | 50um/10Hz  | ML3B-G | ML3B-G | 0.00007              | 0.00002               | 0.00311              | 0.01750              | 0.05770              | -0.00001              | 0.04867              | 0.50609              | 0.05657                            | 0.70382                            | 8.77115                            | 0.70371                                | 0.00070 |
| AUG 05 2014 Run24               | 50um/10Hz  | ML3B-G | ML3B-G | 0.00007              | 0.00001               | 0.00305              | 0.01683              | 0.05628              | -0.00001              | 0.04737              | 0.49375              | 0.05680                            | 0.70370                            | 8.77283                            | 0.70355                                | 0.00075 |
| AUG 05                          |            |        |        |                      |                       |                      |                      |                      |                       |                      |                      |                                    |                                    |                                    |                                        |         |
